# Supplementary material
Source: PubMed Central journal article supplement (PMC2817630)
Supplement: blood-2009-06-227579_1.pdf [file blood-2009-06-227579_1.pdf]

**PTCL Subtypes**

|                   |                                            | <b>AITL</b> | <b>ALCL-ALK</b> | <b>ALCL+ALK</b> | <b>ATLL</b> | <b>T/NKCL</b> | <b>PTCL-U</b> |    |
|-------------------|--------------------------------------------|-------------|-----------------|-----------------|-------------|---------------|---------------|----|
| ↑<br>Percent<br>↓ | <b>Age &gt; 60 years</b>                   | 60          | 33              | 0               | 50          | 23            | 53            |    |
|                   | <b>Ann Arbor Stage III/IV</b>              | 83          | 50              | 55              | 83          | 54            | 69            |    |
|                   | <b>Karnofsky performance status</b>        | 31          | 17              | 18              | 50          | 15            | 28            |    |
|                   | <b>High LDH</b>                            | 24          | 50              | 50              | 50          | 75            | 57            |    |
|                   | <b>Extranodal sites ≥2</b>                 | 48          | 33              | 27              | 17          | 38            | 31            |    |
|                   | <b>B-symptoms</b>                          | 69          | 50              | 36              | 50          | 48            | 36            |    |
|                   | <b>Platelets &lt; (150x10<sup>3</sup>)</b> | 21          | 0               | 9               | 17          | 23            | 22            |    |
|                   | <b>BM involvement</b>                      | 49          | 17              | 0               | 17          | 23            | 19            |    |
|                   | <b>IPI*</b>                                | 0-1         | 15              | 50              | 50          | 25            | 33            | 26 |
|                   |                                            | 2-3         | 62              | 33              | 40          | 50            | 67            | 46 |
|                   |                                            | 4-5         | 24              | 17              | 10          | 25            | 0             | 28 |
|                   | <b>PIT</b>                                 | 0-1         | 41              | 67              | 80          | 50            | 58            | 57 |
|                   |                                            | 2-4         | 59              | 33              | 20          | 50            | 42            | 43 |
|                   | <b>CHOP or CHOP-like therapy</b>           |             | 41              | 67              | 45          | 55            | 36            | 59 |
|                   | <b>Response</b>                            | Complete    | 53              | 67              | 64          | 45            | 50            | 43 |
| Partial           |                                            | 21          | 33              | 18              | 27          | 0             | 26            |    |
| No                |                                            | 26          | 0               | 18              | 27          | 42            | 26            |    |
| Indeterminate     |                                            | 0           | 0               | 0               | 0           | 8             | 6             |    |

Abbreviations: IPI: International Prognostic Index; PIT: Prognostic Index for PTCL-U; BM: Bone marrow; LDH: Lactate dehydrogenase

\*No significant differences (p >0.2) in percentage of cases in the different PTCL entities by IPI risk group was observed between this series and the published PTCL series (reference 7)
