# Supplementary material
Source: PubMed Central journal article supplement (PMC2817630)
Supplement: blood-2009-06-227579_2.pdf [file blood-2009-06-227579_2.pdf]

## (A) AITL

| <i>Pathway</i>                      | <i>Number of genes</i> | <i>P-value</i> | <i>FDR</i> | <i>Brief Description</i>                                                                               | <i>Reference shown in Broad Institute' MSigDB</i>                 |
|-------------------------------------|------------------------|----------------|------------|--------------------------------------------------------------------------------------------------------|-------------------------------------------------------------------|
| NF- $\kappa$ B target genes         | 106                    | 0.05           | 0.15       | Genes upregulated by NF-kappa B                                                                        | Oncogene. 2003 Apr 3;22(13):1955-64                               |
| IL6 induced genes                   | 145                    | 0.05           | 0.16       | Gene expression modulated on addition of interleukin-6.                                                | Blood. 2004 Jan 1;103(1):242-51.                                  |
| Immunosuppression related genes     | 64                     | 0.03           | 0.17       | Genes upregulated in peripheral blood lymphocytes treated with immunosuppressive drugs (sirolimus etc) | Am J Transplant. 2004 Sep;4(9):1475-89                            |
| TGF- $\beta$ Signaling              | 49                     | 0.02           | 0.24       | Genes associated with TGF-beta pathway                                                                 | Biocarta (www.biocarta.com)                                       |
| VEGF regulated genes                | 30                     | 0.05           | 0.17       | Up-regulated genes after VEGF treatment                                                                | Angiogenesis. 2001;4(4):289-98                                    |
| Genotoxic stress                    | 40                     | 0.02           | 0.14       | Genes upregulated upon treatment with DNA damaging agents e.g. Cisplatin, Adriamycin                   | Oncogene. 2005 Jun 30;24(28):4572-9.                              |
| TP 53 signaling                     | 93                     | 0.03           | 0.17       | Curated gene signature of p53 during genomic stress                                                    | Broad Institute<br>http://www.broad.mit.edu/gsea/msigdb           |
| <i>T-cell related</i>               |                        |                |            |                                                                                                        |                                                                   |
| TCR signaling                       | 44                     | 0.04           | 0.16       | T cell activation upon engagement of TCR                                                               | BioCarta                                                          |
| IL12 signaling                      | 20                     | 0.01           | 0.14       | IL12 associated genes in T-cells                                                                       | BioCarta                                                          |
| IL2 Signaling                       | 22                     | 0.04           | 0.19       | IL-2 promotes proliferation via JAK and MAP kinase in T cells                                          | BioCarta                                                          |
| T follicular helper cells (1)       | 46                     | 0.02           | 0.14       | Genes upregulated in human T <sub>FH</sub> cells versus other CD4+ T-cell types (naïve, memory)        | Blood. 2004 Oct 1;104(7):1952-60.                                 |
| T follicular helper cells (2)       | 437                    | 0.00           | 0.00       | Genes associated with germinal center helper T-ells                                                    | J Immunol. 2004 Jul; 173(1):68-78.                                |
| T follicular helper cells (3)       | 129                    | 0.05           | 0.08       | Follicular helper T cells                                                                              | Lymphoid gene signature data-base<br>Immunol Rev. 2006; 210:67-85 |
| Published AITL genes-signature      | 220                    | 0.00           | 0.00       | AITL upregulated genes                                                                                 | Blood 109:4952-63, 2007                                           |
| Single positive CD4 T- cell         | 231                    | 0.02           | 0.05       | Genes upregulated in single positive thymic CD4 T cells compared to double positive T-cells            | - Lymphoid gene signature data-base                               |
| Anergic T cells                     | 30                     | 0.05           | 0.09       | T cell stimulated with ionomycin                                                                       | - as above                                                        |
| <i>B cell related</i>               |                        |                |            |                                                                                                        |                                                                   |
| IL4 signaling                       | 66                     | 0.00           | 0.13       | Genes induced in peripheral B cells with the cytokine IL-4                                             | Blood. 2005 Apr 1;105(7):2924-32.                                 |
| BCR Signaling                       | 45                     | 0.00           | 0.11       | Members of the BCR signaling pathway                                                                   | Signaling Alliance (Signaling Alliance)                           |
| CD40 signaling in GCB- cells        | 97                     | 0.00           | 0.08       | CD40 regulated genes transformed GC B cells in vitro                                                   | Blood. 2004 Dec 15;104(13):                                       |
| <i>Dendritic cell activation</i>    |                        |                |            |                                                                                                        |                                                                   |
| Dendritic cell activation           | 50                     | 0.01           | 0.14       | Genes up-regulated in DC stimulated with IL-1 $\beta$ /TNFa/LPS                                        | Int Immunol. 2002 Oct;14(10):1203-13                              |
| Monocytes (CD14+) derived dendritic | 106                    | 0.01           | 0.15       | Up-regulated mRNAs in monocyte-derived DCs cultured in GM-CSF/IL-4                                     | J Biol Chem. 2001 May 25;276(21):17920-31.                        |
