# Supplementary material
Source: PubMed Central journal article supplement (PMC2817630)
Supplement: blood-2009-06-227579_3.pdf [file blood-2009-06-227579_3.pdf]

Transcriptional factors\*

\* HTLV1 Tax protein induced transcription factors and their target genes

| <i>Pathway</i>                | <i>Number of genes</i> | <i>P-value</i> | <i>FDR</i> | <i>Brief Description</i>                                                                           | <i>Reference</i>                   |
|-------------------------------|------------------------|----------------|------------|----------------------------------------------------------------------------------------------------|------------------------------------|
| Published ATLL-gene signature | 220                    | 0.001          | 0.001      | ATLL upregulated genes                                                                             | Blood 105:1204-13, 2005            |
| TCR signaling (1)             | 26                     | 0.008          | 0.016      | TCR complex and co-stimulatory/co-inhibitory molecules                                             | Lymphoid gene-signature data base. |
| TCR signaling (2)             | 44                     | 0.017          | 0.024      | T cell activation upon engagement of TCR                                                           | BioCarta                           |
| Mature CD4+ T-cells           | 156                    | 0.002          | 0.034      | Genes upregulated in peripheral Blood CD4+ T-cells compared to single positive thymic CD4+ T-cells | Lymphoid gene-signature data base  |

| Transcription factor | Number of target genes | P-value  | FDR   | Reference      |
|----------------------|------------------------|----------|-------|----------------|
| ATF1                 | 118                    | <0.0023  | 0.015 | BRB-ArrayTools |
| NF- $\kappa$ B1      | 265                    | <0.006   | 0.012 | -as above      |
| CREB1                | 231                    | <0.0046  | 0.04  | - as above     |
| RAR $\gamma$         | 48                     | < 0.0001 | <0.01 | - as above     |
| MYB                  | 13                     | <0.0001  | 0.03  | - as above     |
