# Supplementary material
Source: PubMed Central journal article supplement (PMC2817630)
Supplement: blood-2009-06-227579_4.pdf [file blood-2009-06-227579_4.pdf]

| <i>Transcription factors</i> | <i>Number of target genes</i> | <i>P-value</i> | <i>FDR</i> | <i>Reference</i> |
|------------------------------|-------------------------------|----------------|------------|------------------|
| ESR1                         | 138                           | 0.00043        | 0.015      | BRB-ArrayTools   |
| STAT3                        | 83                            | 3E-07          | <0.01      | -as above        |
| BCL3                         | 6                             | 0.00044        | <0.01      | - as above       |
| ETS1                         | 216                           | 0.00214        | 0.02       | - as above       |

ESR1: estrogen receptor 1; ETS1: (v-ets erythroblastosis virus E26 oncogene homolog 1)
