# Supplementary material
Source: PubMed Central journal article supplement (PMC2817630)
Supplement: blood-2009-06-227579_5.pdf [file blood-2009-06-227579_5.pdf]

| <b>Gene signatures</b>           | <b>Number of genes</b> | <b>P-value</b> | <b>FDR</b> | <b>Brief Description</b>                                                                                | <b>Reference</b>                   |
|----------------------------------|------------------------|----------------|------------|---------------------------------------------------------------------------------------------------------|------------------------------------|
| Tolerogenic dendritic cells      | 45                     | 0.003          | 0.048      | Upregulated genes in hepatocyte growth factor -activated monocytes                                      | Blood. 2006 Jul 1;108(1):218-27.   |
| CD31 negative stromal stem cells | 46                     | 0.0003         | 0.02       | Upregulated genes in CD31 (-) stem cells isolated from human adipose tissue compared to CD31 (+) cells. | Mol Biol Cell. 2005;16(3):1131-41. |
| Cell adhesion                    | 15                     | 0.001          | 0.04       | Cell adhesion molecules                                                                                 | GO (Gene Ontology)                 |
