# Supplementary material
Source: PubMed Central journal article supplement (PMC2817630)
Supplement: blood-2009-06-227579v2_2.pdf [file blood-2009-06-227579v2_2.pdf]

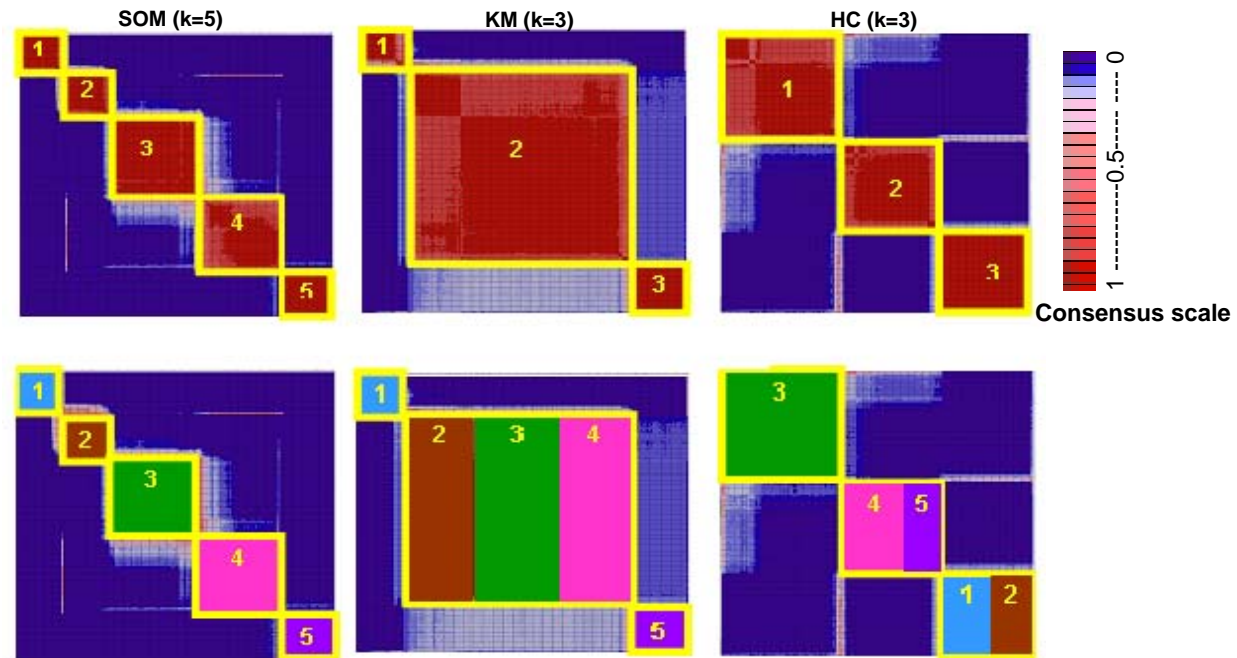

| SOM 1   | SOM 2                                                | SOM 3                           | SOM 4                                          | SOM5                         |
|---------|------------------------------------------------------|---------------------------------|------------------------------------------------|------------------------------|
| PTCL-U1 | ALK(-)ALCL<br>ALK(+)ALCL-2<br>PTCL-U2<br>AITL(minor) | AITL (major)<br>ATLL<br>PTCL-U3 | ALK(+)ALCL-1<br>NKCL<br>PTCL-U4 (with CT-PTCL) | Normal cells<br>& cell lines |
