# Supplementary material
Source: PubMed Central journal article supplement (PMC2817630)

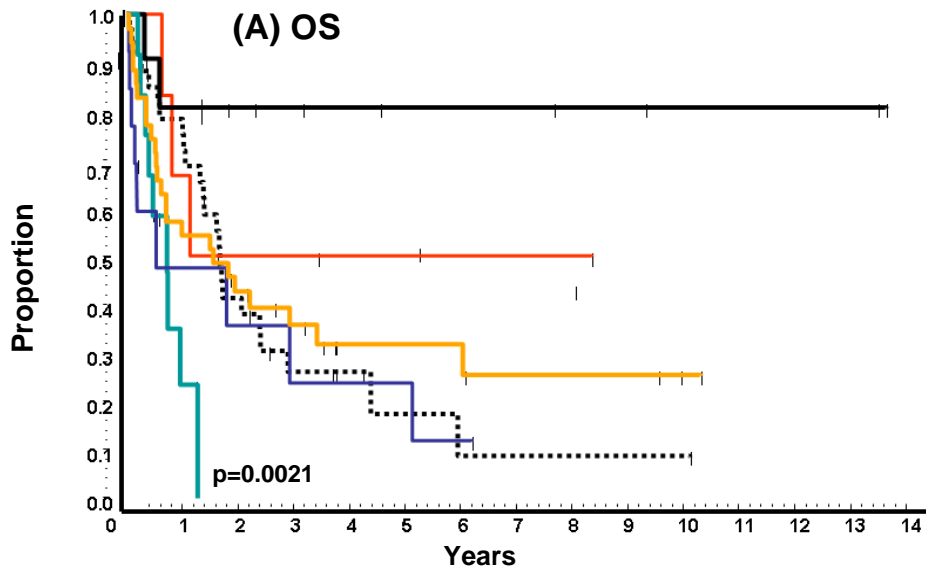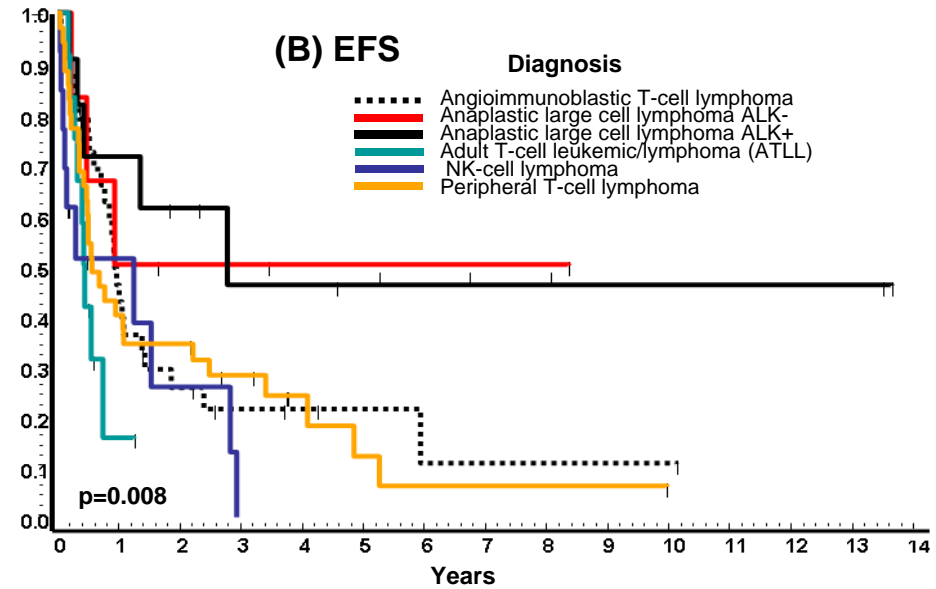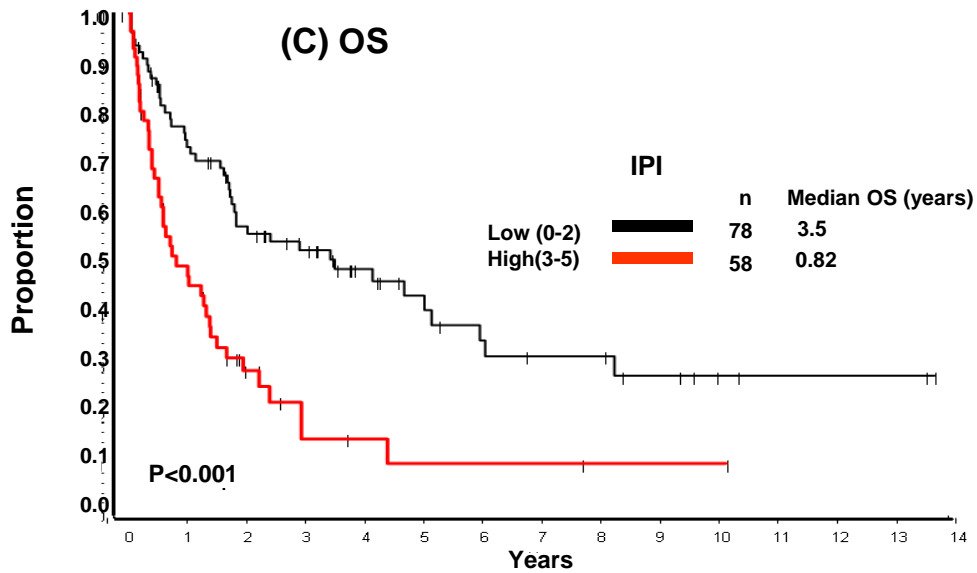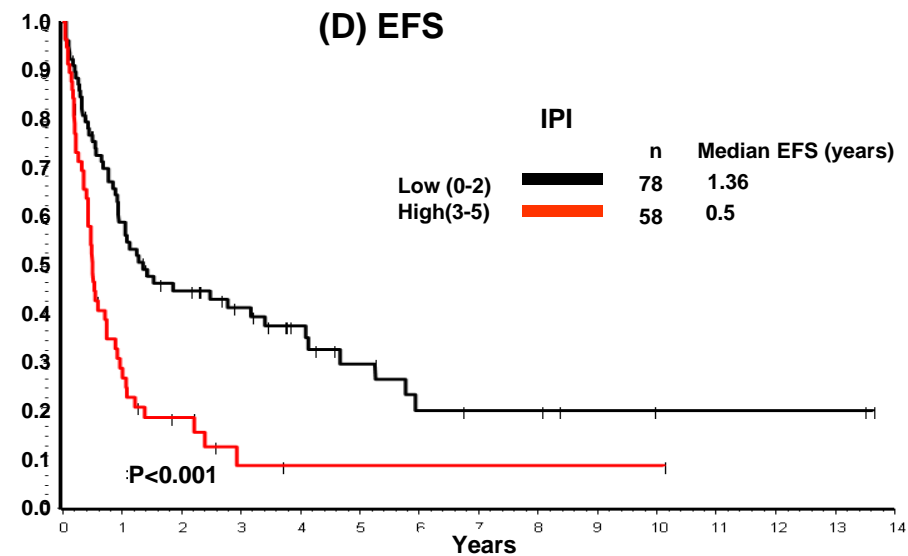

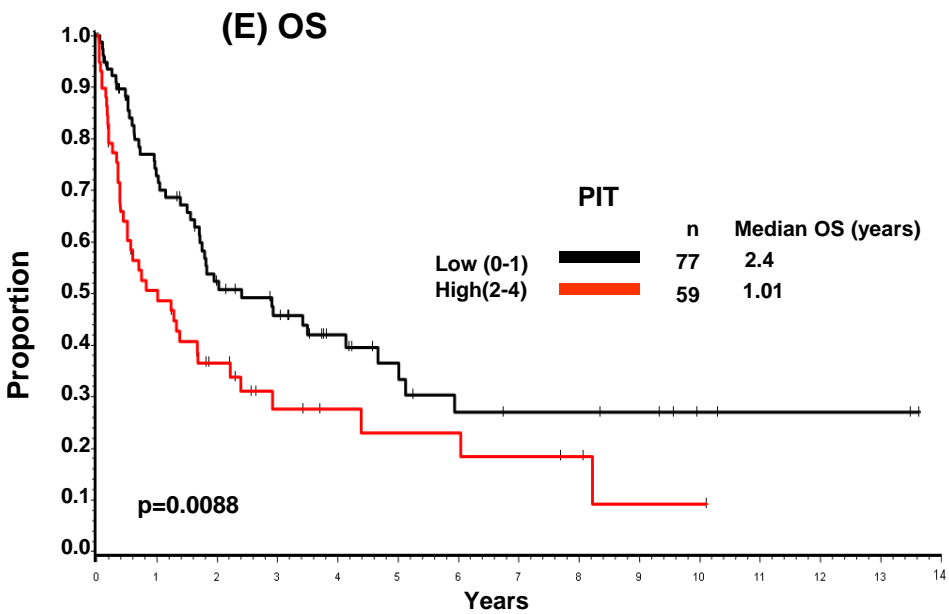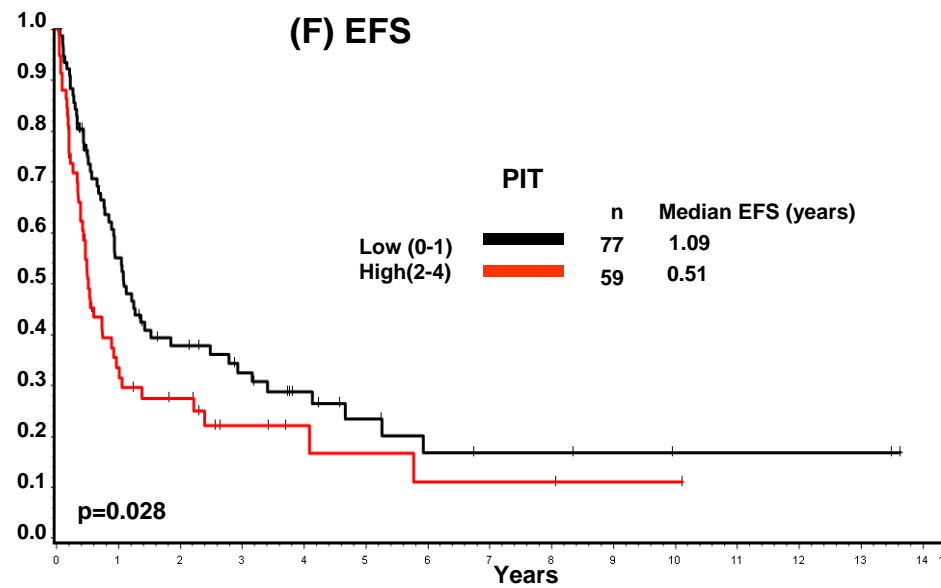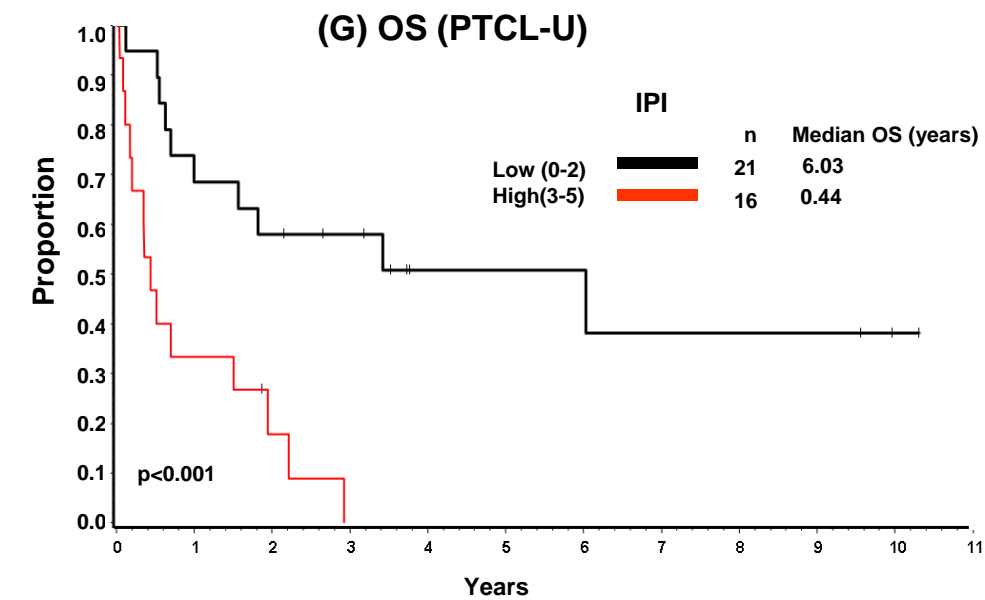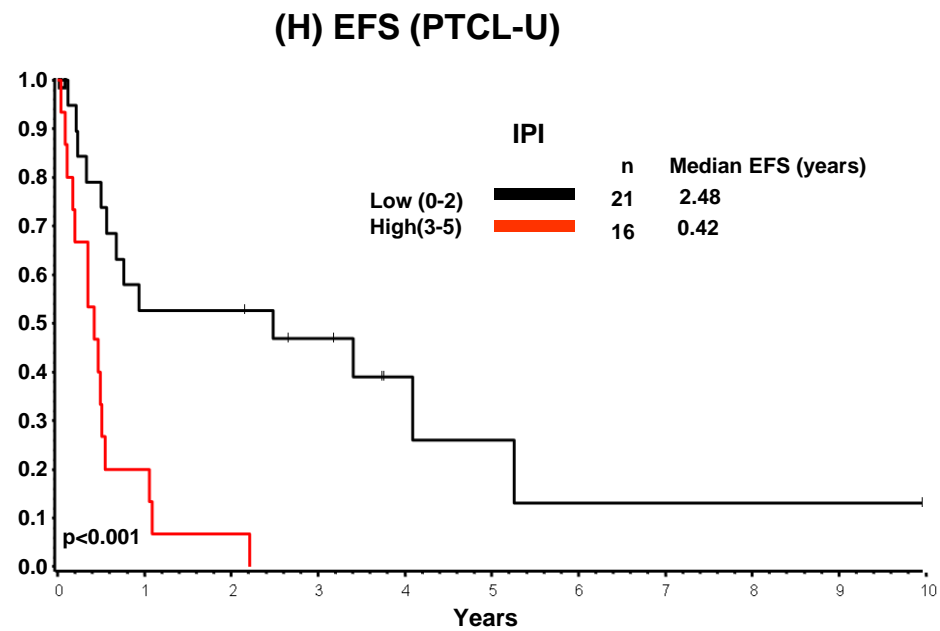

**(I) OS (PTLC-U)**

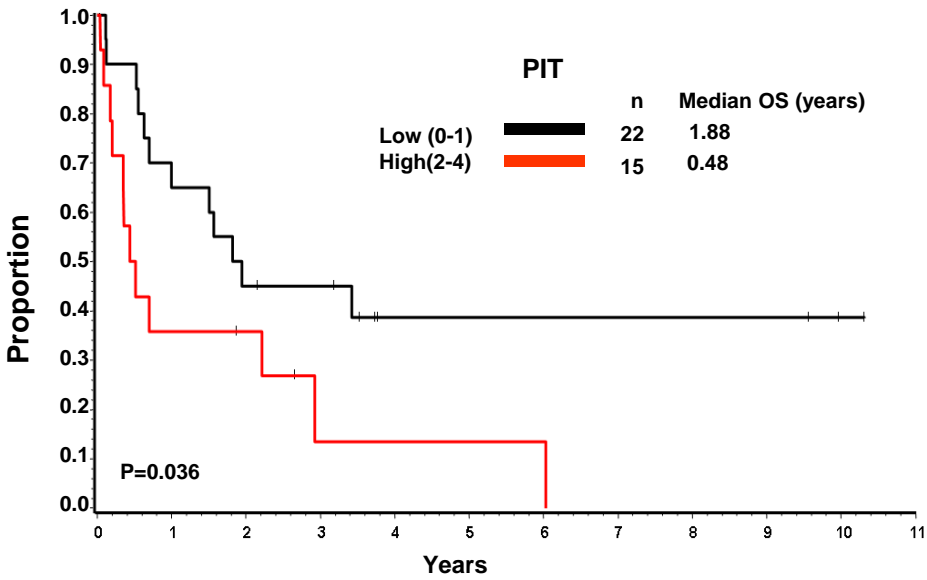

**(J) EFS (PTCL-U)**

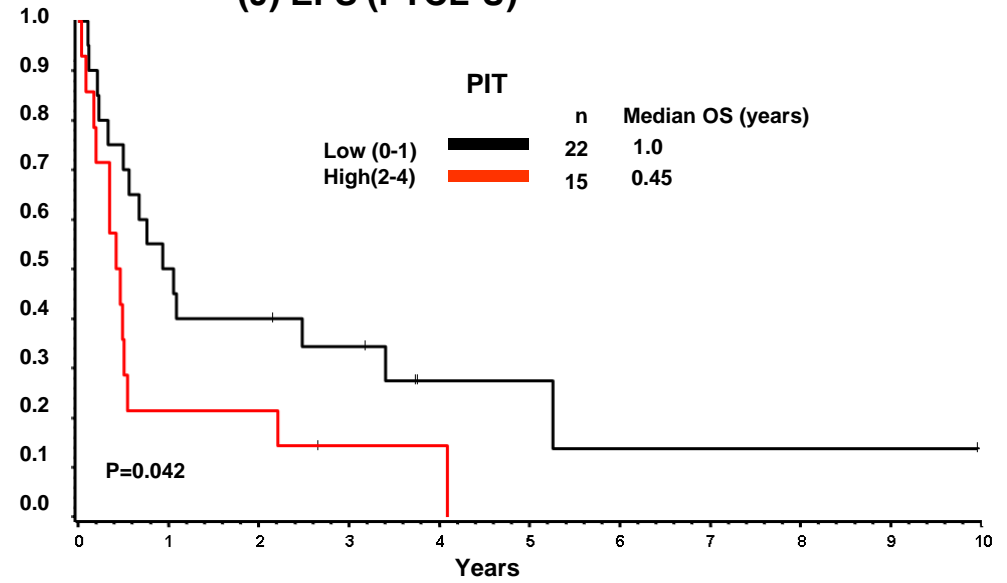

**(K) OS**

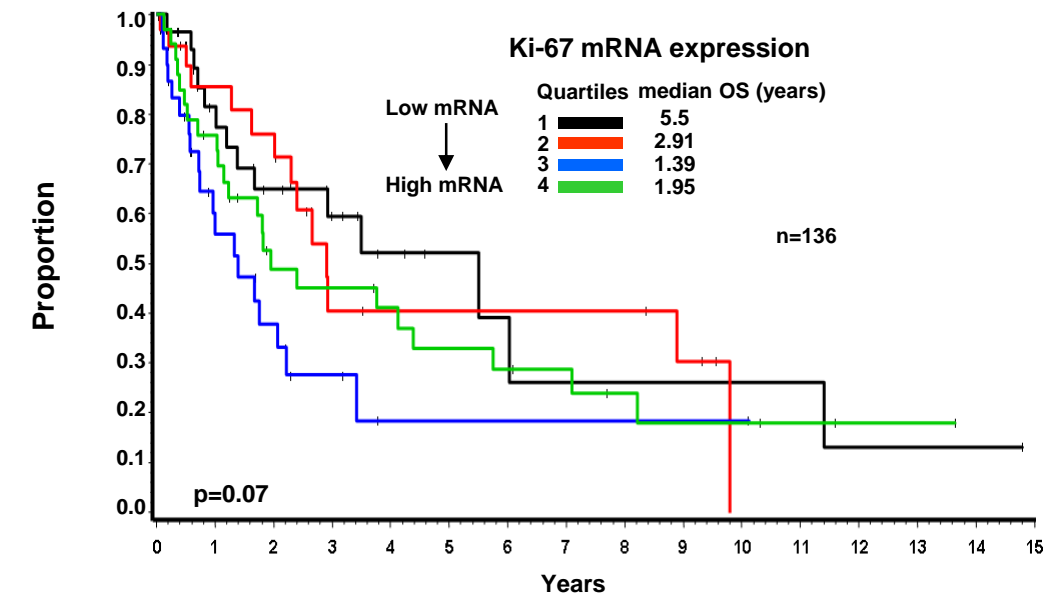

Supplement: blood-2009-06-227579v2_1.pdf [file blood-2009-06-227579v2_1.pdf]

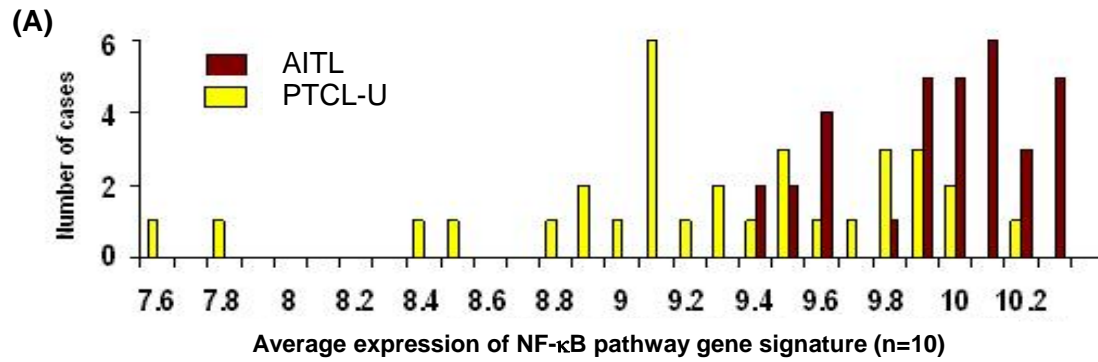

(B) Expression of  $T_{FH}$  signature proposed by *Chatnova et al* (J.I, 2004, ref. 32) in normal T cell subsets

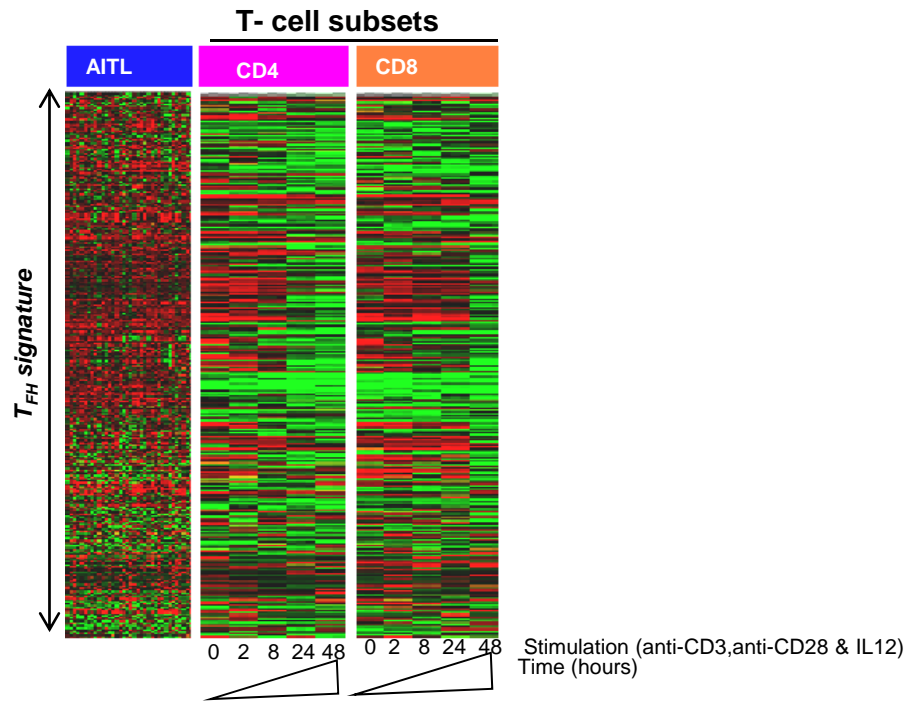

Supplement: blood-2009-06-227579v2_3.pdf [file blood-2009-06-227579v2_3.pdf]

(A)

ALK signature proposed by *Piva et.al* (JCI, 2006, ref 39) showed marginal enrichment in ALK(+) ALCL

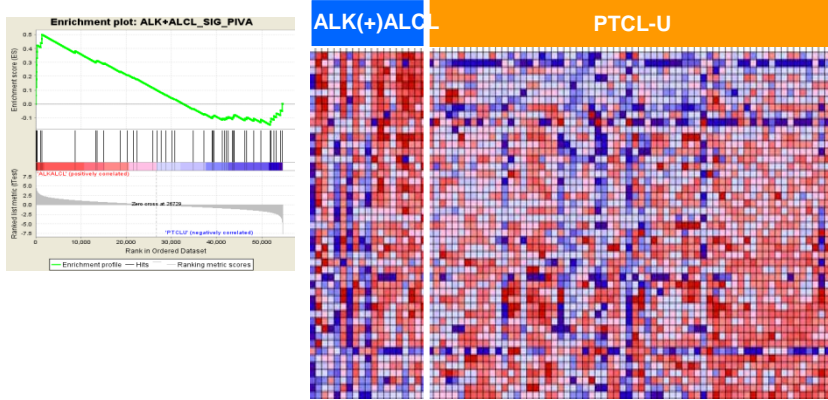

(B)

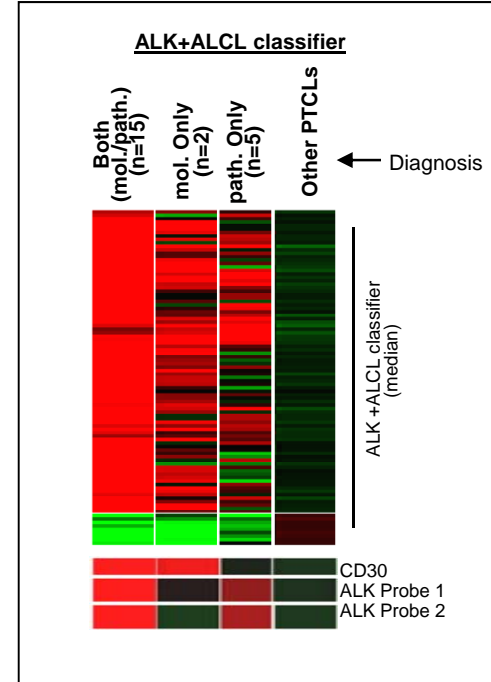

Supplement: blood-2009-06-227579v2_4.pdf [file blood-2009-06-227579v2_4.pdf]

**(A)**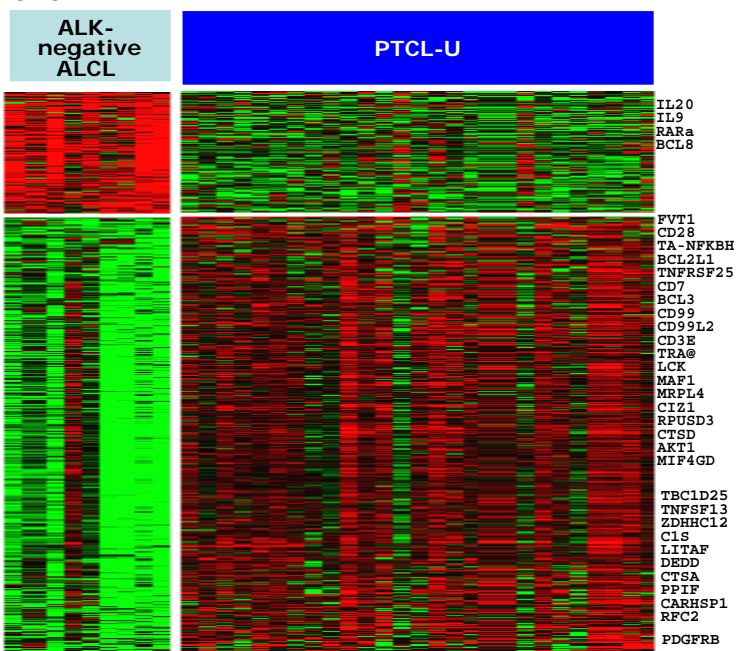**(B)**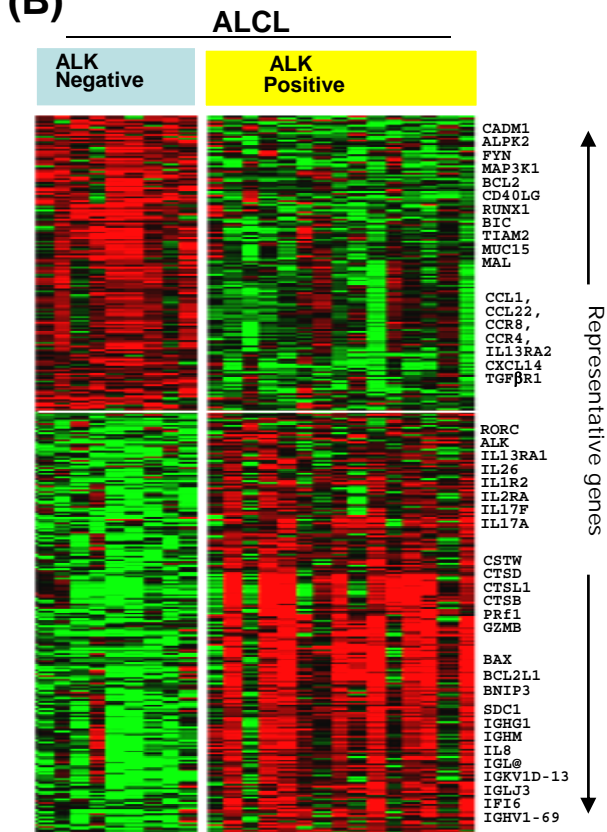**(C)**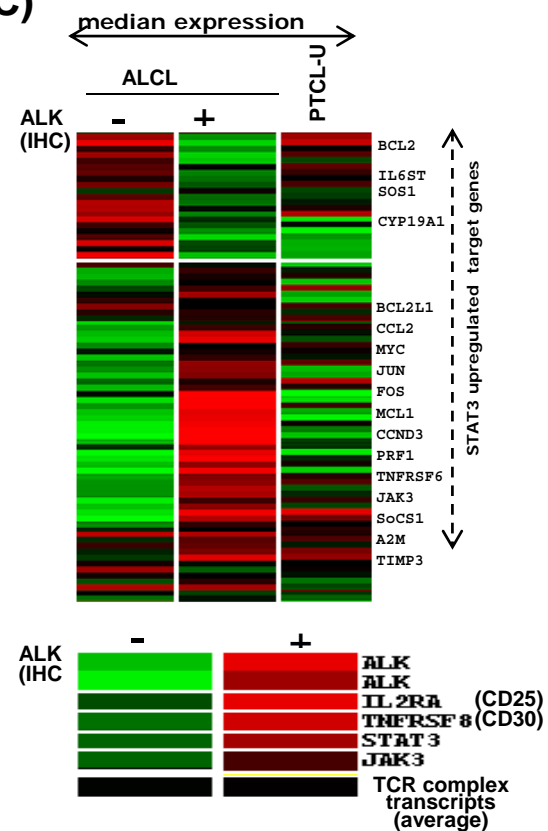

Supplement: blood-2009-06-227579v2_5.pdf [file blood-2009-06-227579v2_5.pdf]
